# Supplementary material for: Effects of Antioxidant in Adjunct with Periodontal Therapy in Patients with Type 2 Diabetes: A Systematic Review and Meta-Analysis
Source: MDPI journal article supplement (doi:10.3390/antiox10081304), 2021-08-18
Supplement: s1 [file s1]

**Table S1.** Excluded investigations

| <b>Author<br/>(Year)</b>      | <b>Reason</b>                                                                                                               |
|-------------------------------|-----------------------------------------------------------------------------------------------------------------------------|
| Javid et al. [50]<br>(2020)   | Irrelevant outcome measurement; no periodontal parameters measurement. Other analysis of the previous study[32].            |
| Montero et al. [51]<br>(2017) | Insufficient inclusion criteria; not performed periodontal non-surgical therapy such as scaling and root planing            |
| Cutando et al. [40]<br>(2015) | Insufficient inclusion criteria; comparing between diabetes and healthy patients. Other analysis of the previous study[28]. |
| Amaliya et al. [52]<br>(2015) | Prospective cohort study, not RCT                                                                                           |
